# Supplementary material for: A spatio-temporal analysis of dengue spread in a Brazilian dry climate region
Source: PubMed Central journal article supplement (PMC8178350; doi:10.1038/s41598-021-91306-z), 2021-06-04
Supplement: 41598_2021_91306_MOESM1_ESM.pdf [file 41598_2021_91306_MOESM1_ESM.pdf]

# Supplementary Information -S1

The  $\rho$ DCCA method<sup>16</sup> is based on the ratio between the detrended covariance function  $F_{xy}^2$  of the Detrended Cross-Correlation Analysis method<sup>20</sup> and the variance function without trend  $F_{zz}$  (with  $z = x$  or  $z = y$ ) of the Detrended Fluctuation Analysis method (DFA)<sup>19</sup>. It is shown in five steps below:

- **Step I:** Starting from two different time series,  $x_i$  and  $y_i$ , with  $i = 1, 2, \dots, N$  (time series length). From the original time series two new integrated time series are obtained (Eq.1):

$$X_k = \sum_{i=1}^k [x_i - \bar{x}] \text{ and } Y_k = \sum_{i=1}^k [y_i - \bar{y}] \quad (1)$$

where  $\bar{x}$  and  $\bar{y}$  represent the mean value of each time series, and  $k = 1, \dots, N$ .

**Step II:** We divide these two integrated time series,  $X_k$  and  $Y_k$ , into  $(N - n)$  overlapping boxes of equal length  $n$ , where  $4 \leq n \leq \frac{N}{4}$ , as shown in Figures 1 and 2. The original data present a total  $N$  of dengue case observations equal to 3,404 days, with a minimum scale equal to 4 days and a maximum scale of  $N/4$ . As we have 3,404 observations, the maximum would be 851 boxes. The scale of growth of each time series follows the DFA algorithm<sup>19</sup>. On The Research Resource for Complex Physiologic Signals (PhysioNet) website the DFA scale method is available, (PhysioNet - software projects, <https://physionet.org/content/dfa>).

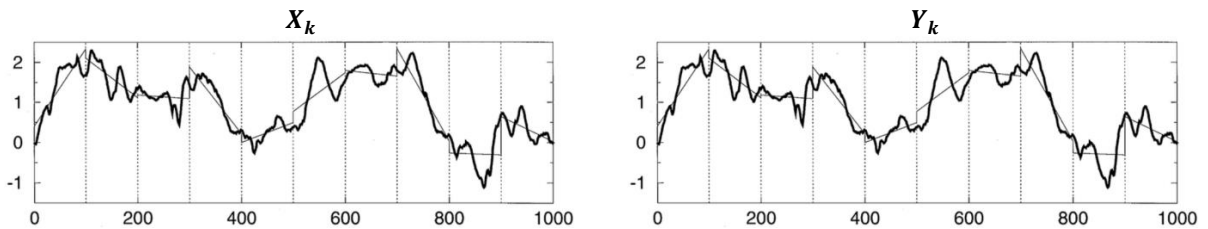

Figure 1: The illustration of the division of the two integrated signals  $X_k$  and  $Y_k$ .

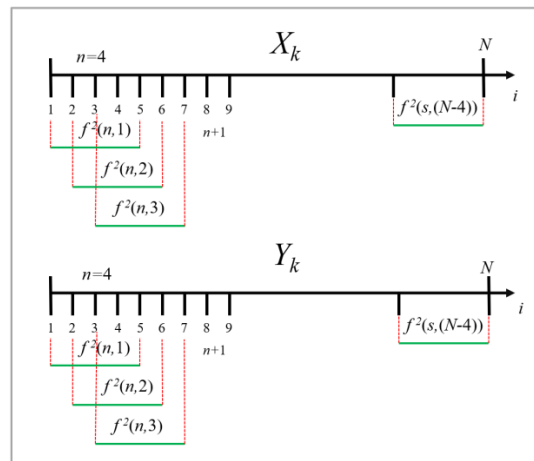

Figure 2: Division of the integrated signals  $X_k$  and  $Y_k$  into  $(N - n)$  overlapping boxes  $n$  size  $n = 4$ , each containing  $n + 1$  values.

- Step III: After this step, the polynomials (order one here) that best adjust the points (by least-squares fit) in each box of each series,  $\tilde{R}_{K,i}$  and  $\tilde{R}'_{K,i}$ , are calculated and therefore the covariance of the residuals in each box (length  $n$ ):

$$f^2 DCCA(n, i) = \frac{1}{n+1} \sum_i^{i+n} (R_k - \tilde{R}_{K,i})(R'_k - \tilde{R}'_{K,i}) \quad (2)$$

- Step IV: The mean over all  $(N - n)$  overlapping boxes is calculated to obtain the detrended covariance function:

$$F_{xy}^2(n) \equiv \frac{1}{N+n} \sum_{i=1}^{N-n} f^2 DCCA(n, i) \quad (3)$$

- Step V: Finally,  $\rho DCCA$  can be calculated by:

$$\rho DCCA(n) = \frac{F_{xy}^2}{F_{xx}(n)F_{yy}(n)} \quad (4)$$

According to [1] the functions  $F_{xx}$  and  $F_{yy}$  are respectively the root mean square fluctuation of each time series  $x_i$  and  $y_i$  separately.  $\rho DCCA(n)$  ranges from:  $-1 \leq \rho DCCA(n) \leq 1$ . When  $\rho DCCA(n) = 1$  this means a perfect cross-correlation,  $\rho DCCA(n) = 0$  there is no cross-correlation, and  $\rho DCCA(n) = -1$  means a perfect anti cross-correlation.
